# Supplementary material for: Application of Flow Cytometry in the Diagnostics Pipeline of Primary Immunodeficiencies Underlying Disseminated Talaromyces marneffei Infection in HIV-Negative Children
Source: PubMed Central journal article supplement (PMC6753679; doi:10.3389/fimmu.2019.02189), 2019-09-13

Supplementary Fig. 1

Gating strategy for intracellular phosphorylated STAT1 (pSTAT1) in CD3+ T-cells and CD14+ T-cells by flow cytometry. Representative flow plots shown for patient F6.2 and a healthy control.

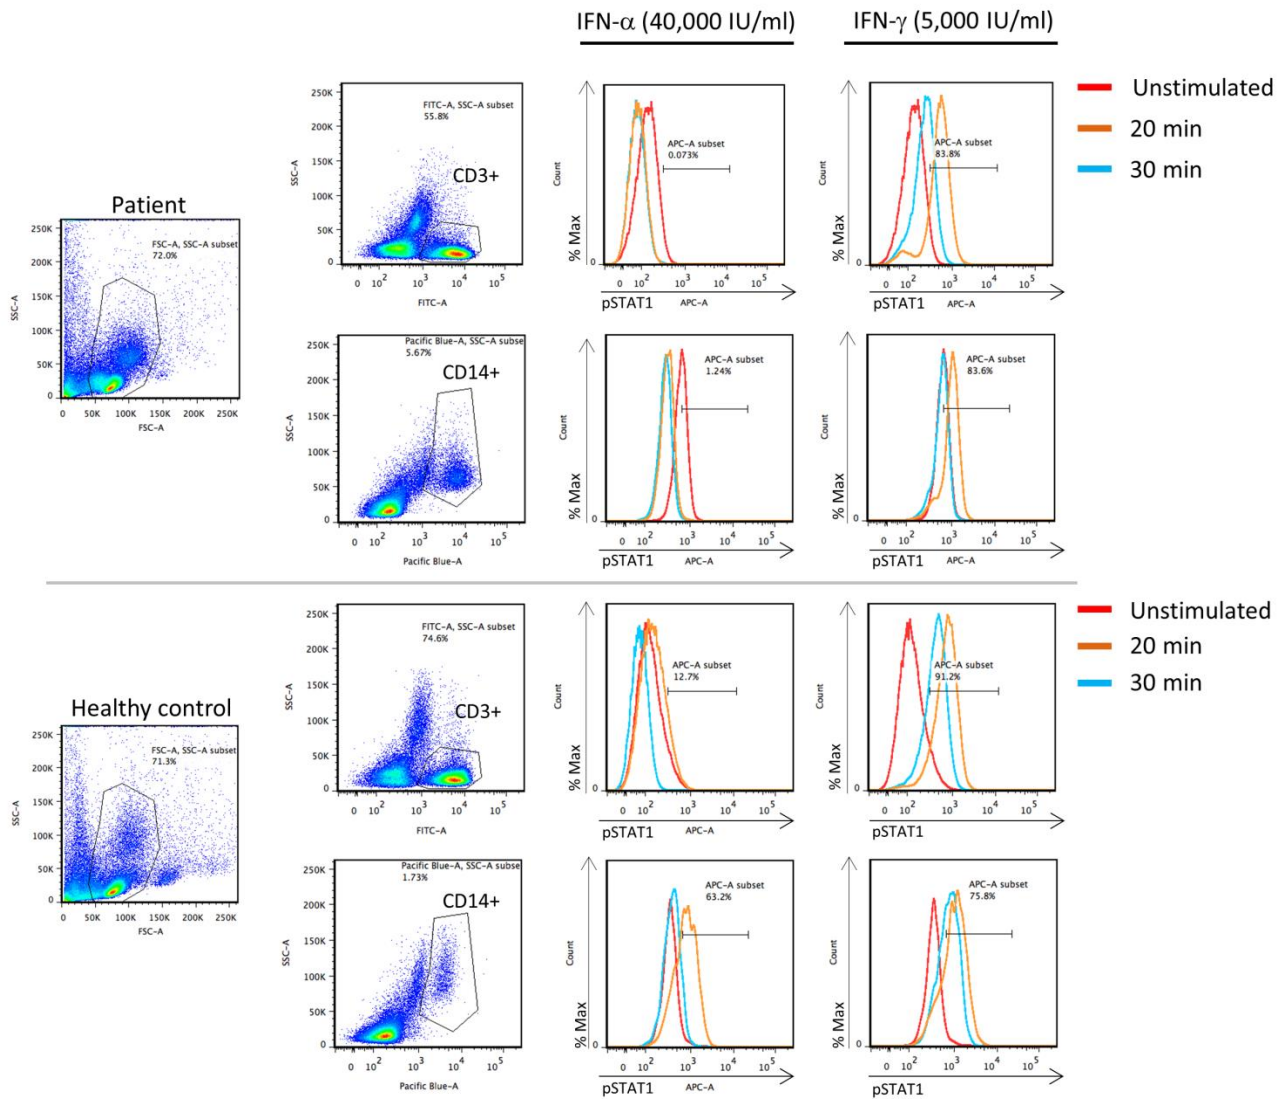

Supplement: Image_1.pdf [file Image_1.pdf]
